# Supplementary material for: Doping indium in β-Bi2O3to tune the electronic structure and improve the photocatalytic activities: first-principles calculations and experimental investigation
Source: Royal Society of Chemistry journal article supplement (doi:10.1039/c4cp02656j), 2014-09-30
Supplement: c4cp02656j1.pdf [file c4cp02656j1.pdf]

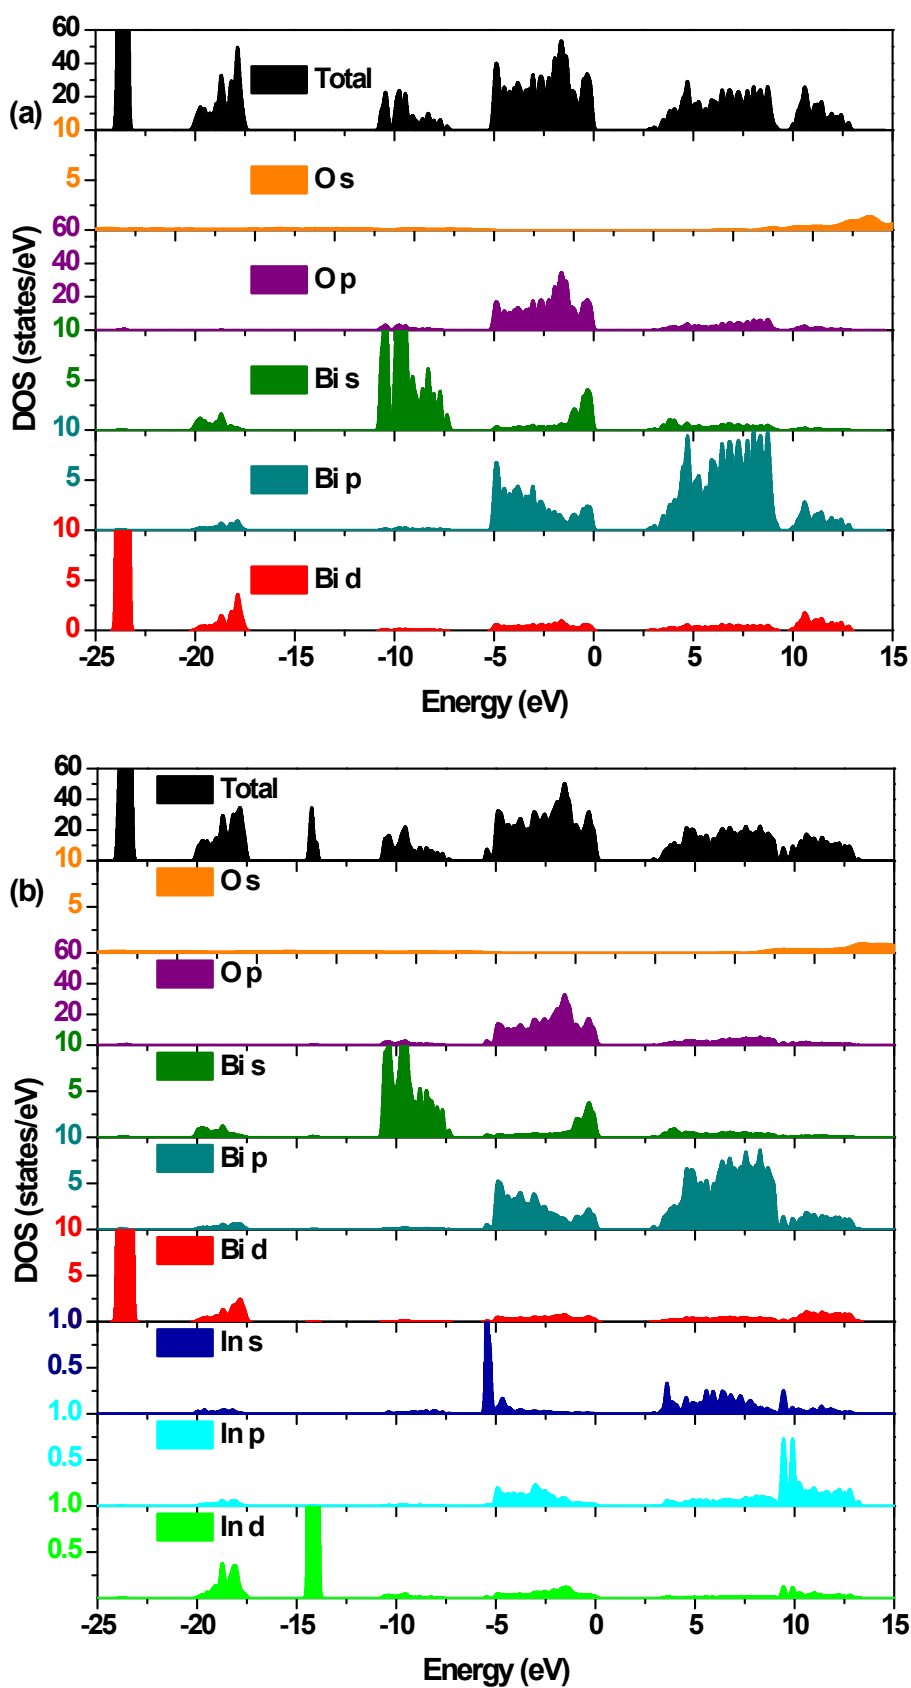

Fig. s1 Total density of states (TDOS) and partial density of states (PDOS) of  $\beta$ - $\text{Bi}_2\text{O}_3$  (a) and In-doped  $\beta$ - $\text{Bi}_2\text{O}_3$  (b).

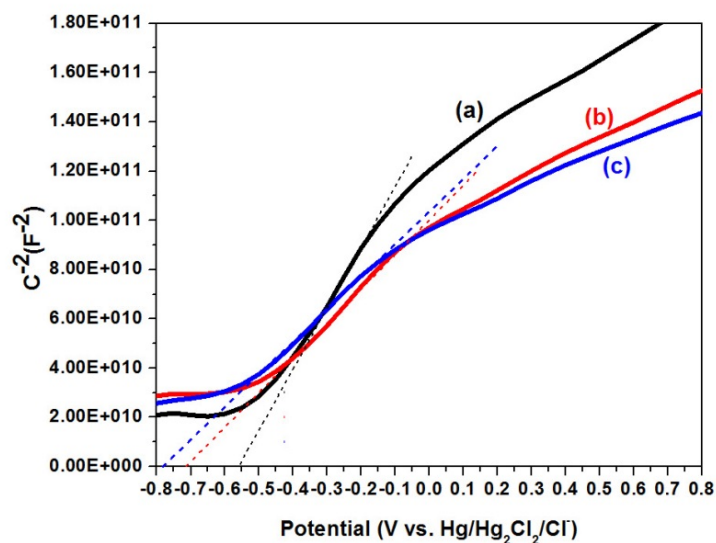

Fig. s2 Mott -Schottky plots for  $\beta$ - $\text{Bi}_2\text{O}_3$  (a) and 1.0 at% In-doped  $\beta$ - $\text{Bi}_2\text{O}_3$  electrodes in the dark (b) and 1.0 at% In-doped  $\beta$ - $\text{Bi}_2\text{O}_3$  electrode under light irradiation(c).

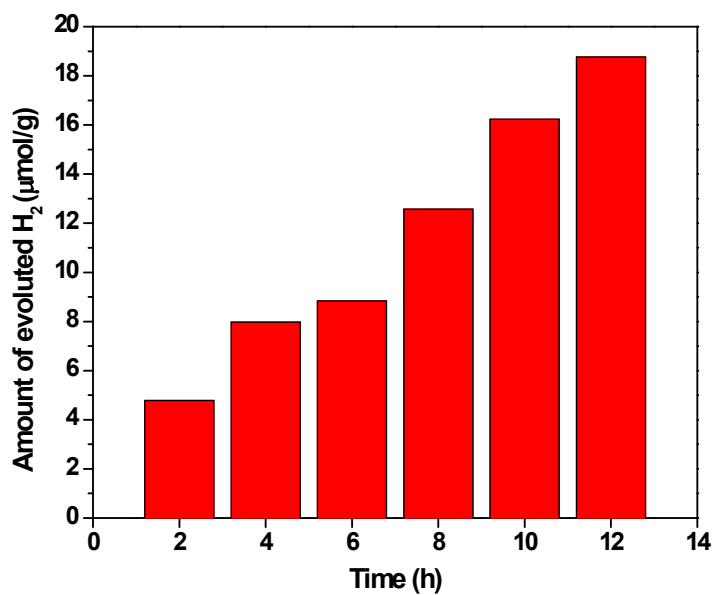

Fig. s3 Photocatalytic hydrogen release by 1.0 at% In-doped  $\beta$ - $\text{Bi}_2\text{O}_3$  with increasing the irradiation time. The distance between the sample and lamp is shortened in comparison with that in Fig.7
